# Supplementary material for: Real-time imaging of hydrogen peroxide dynamics in vegetative and pathogenic hyphae of Fusarium graminearum
Source: PubMed Central journal article supplement (PMC4597226; doi:10.1038/srep14980), 2015-10-08
Supplement: srep14980-s1.pdf [file srep14980-s1.pdf]

Supplementary information

**Real-time imaging of hydrogen peroxide dynamics  
in vegetative and pathogenic hyphae of  
*Fusarium graminearum***

Michael Mentges and Jörg Bormann

WT:PH1

PH1-HyPer

CM

CM  
+ 20 mM H<sub>2</sub>O<sub>2</sub>CM  
+ 1M NaClCM  
+ 1M NaCl  
+ 20 mM H<sub>2</sub>O<sub>2</sub>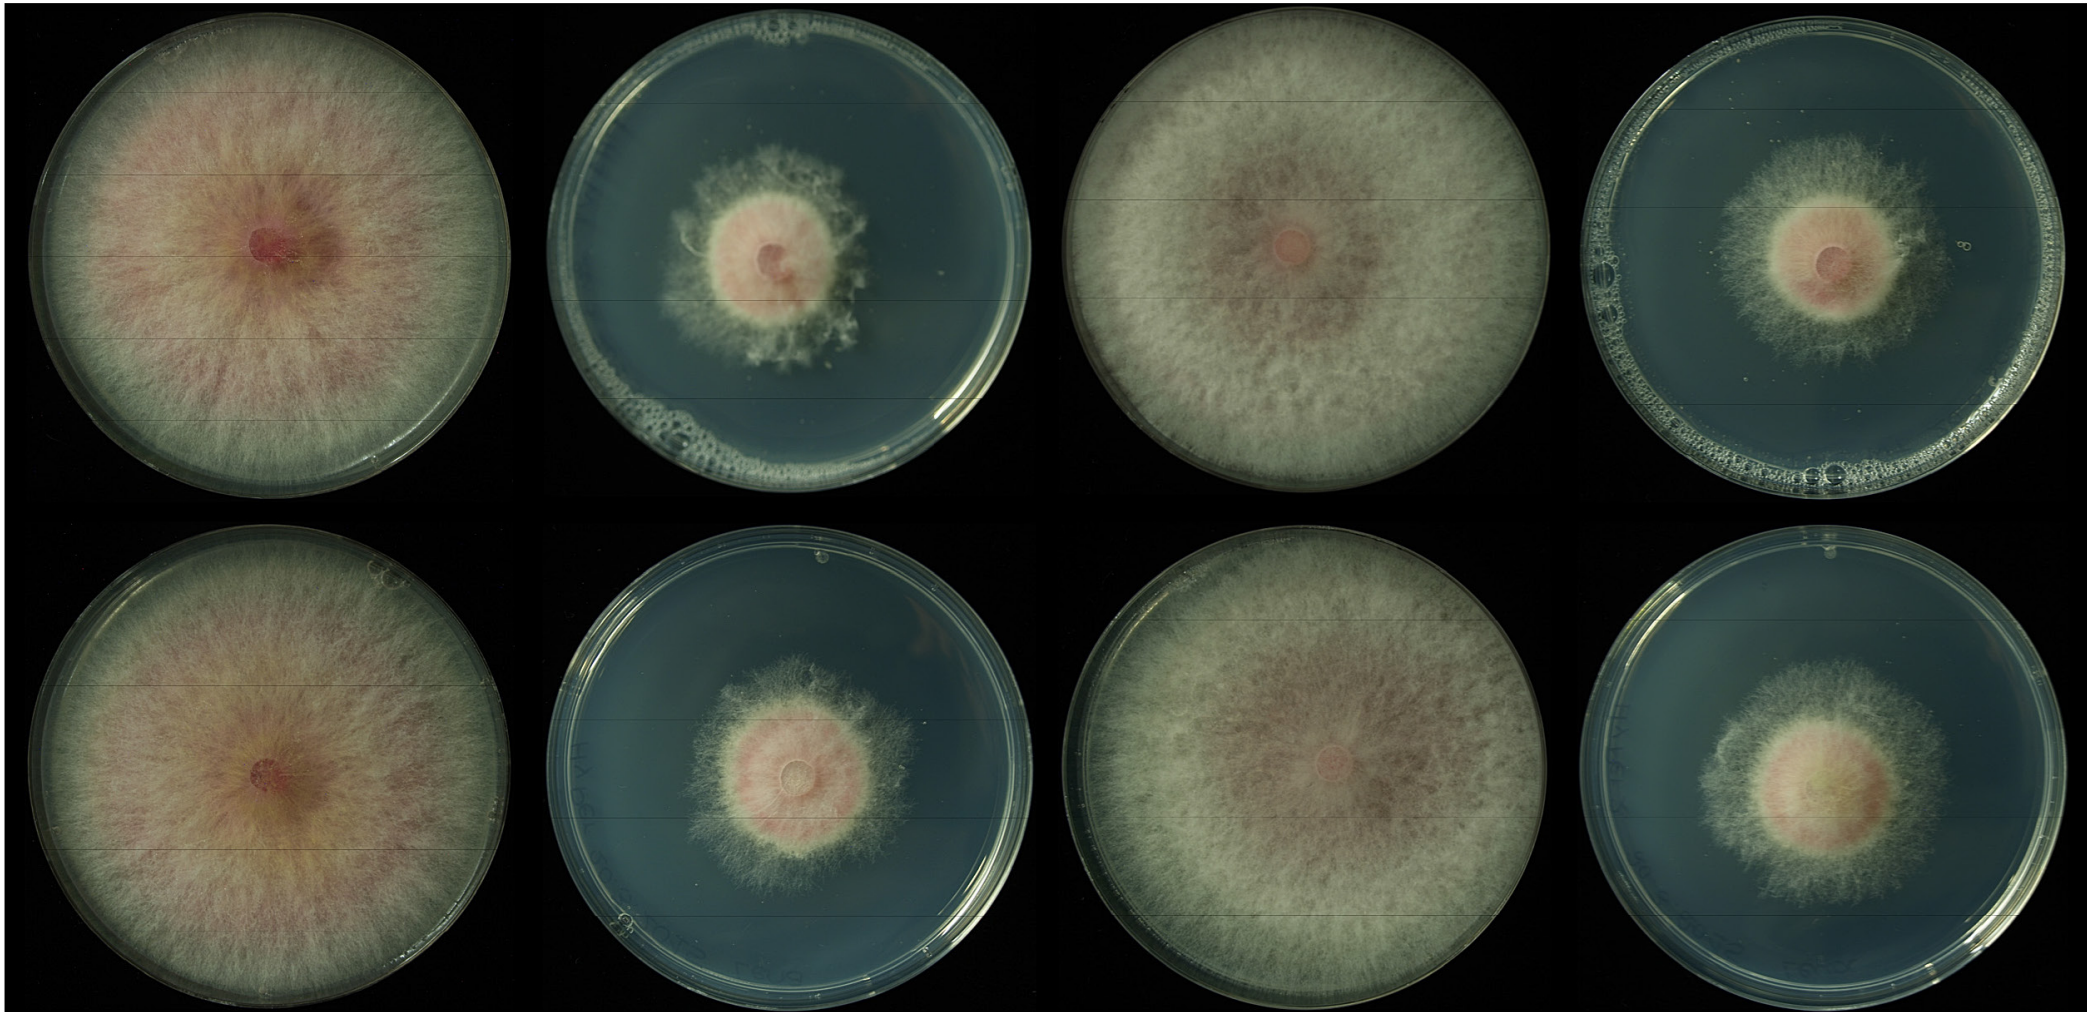

**Figure S1.** Colony morphology of wild type (WT:PH1) and HyPer-2-expressing strain (PH1-HyPer). Plate assay (4 dpi) of the wild type and PH1-HyPer on CM and CM supplemented with 20 mM H<sub>2</sub>O<sub>2</sub> and 1 M NaCl, respectively, and both chemicals in combination.

0 mM H<sub>2</sub>O<sub>2</sub>

40 mM H<sub>2</sub>O<sub>2</sub>

50 mM H<sub>2</sub>O<sub>2</sub>

60 mM H<sub>2</sub>O<sub>2</sub>

70 mM H<sub>2</sub>O<sub>2</sub>

80 mM H<sub>2</sub>O<sub>2</sub>

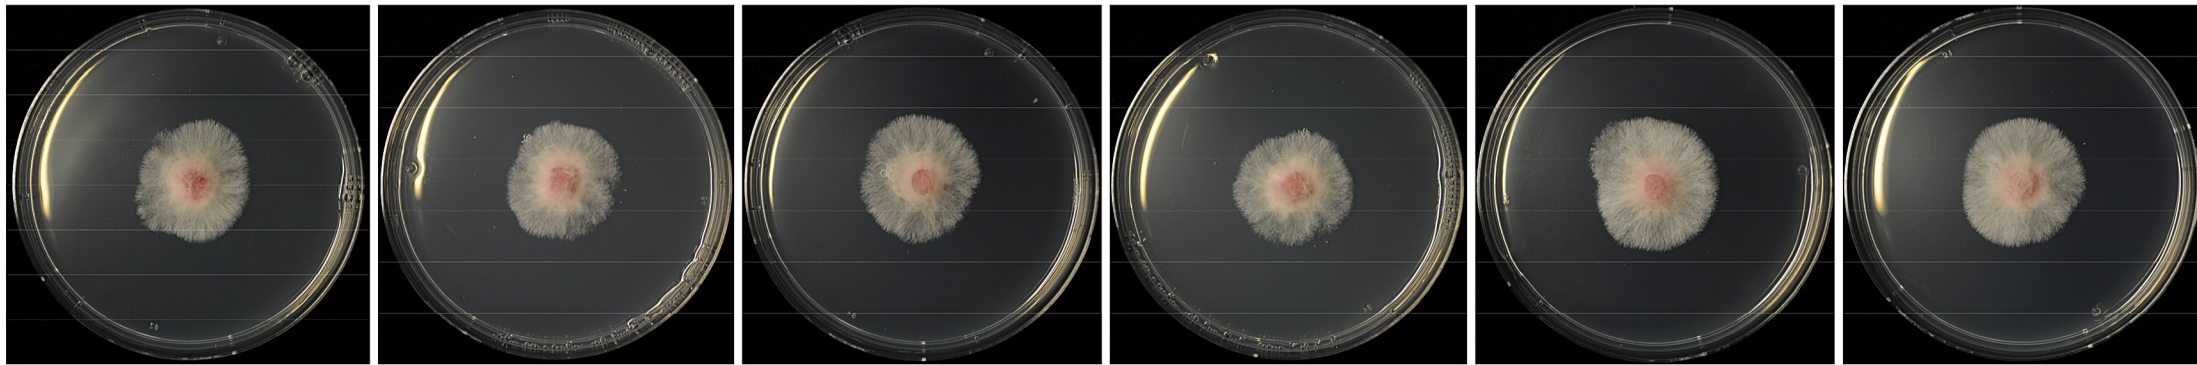

**Figure S2. Fungal viability assay.** Colony morphology (2 dpi) of the *F. graminearum* wild type on CM after treatment with increasing concentrations of H<sub>2</sub>O<sub>2</sub>. Inoculum was taken from microtiter plate assay after injection of H<sub>2</sub>O<sub>2</sub> and fluorescence measurement for 45 min. Treatment with up to 80 mM H<sub>2</sub>O<sub>2</sub> did not compromise fungal viability.

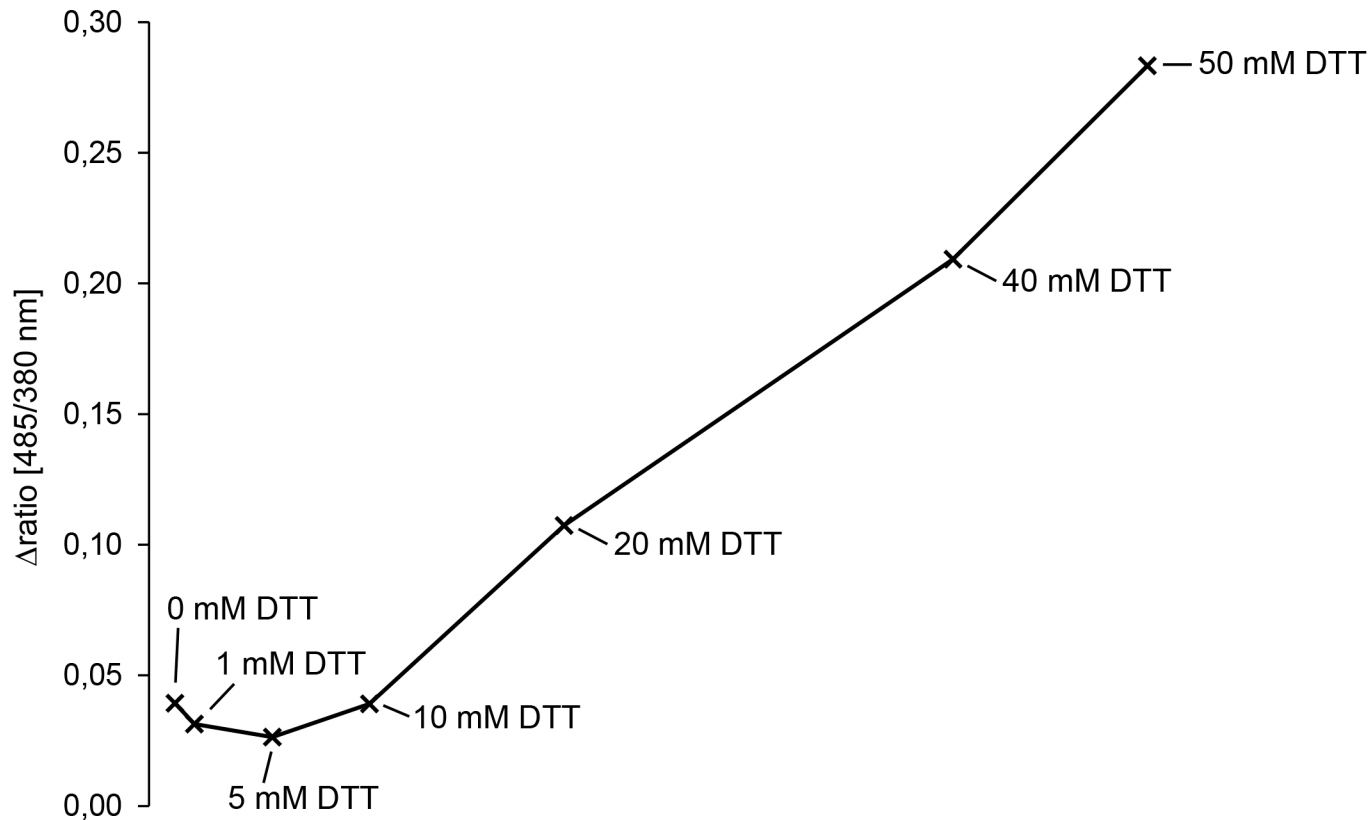

**Figure S3. HyPer sensitivity assay.** Assay for the relative changes in the ratio [485/380nm] in response to increasing dithiothreitol (DTT) concentrations. Mycelia were raised in a 96-well plate filled with 100  $\mu$ l minimal agar medium and analyzed in a fluorometer. Prior to DTT injection 50 mM  $H_2O_2$  were injected in each well.

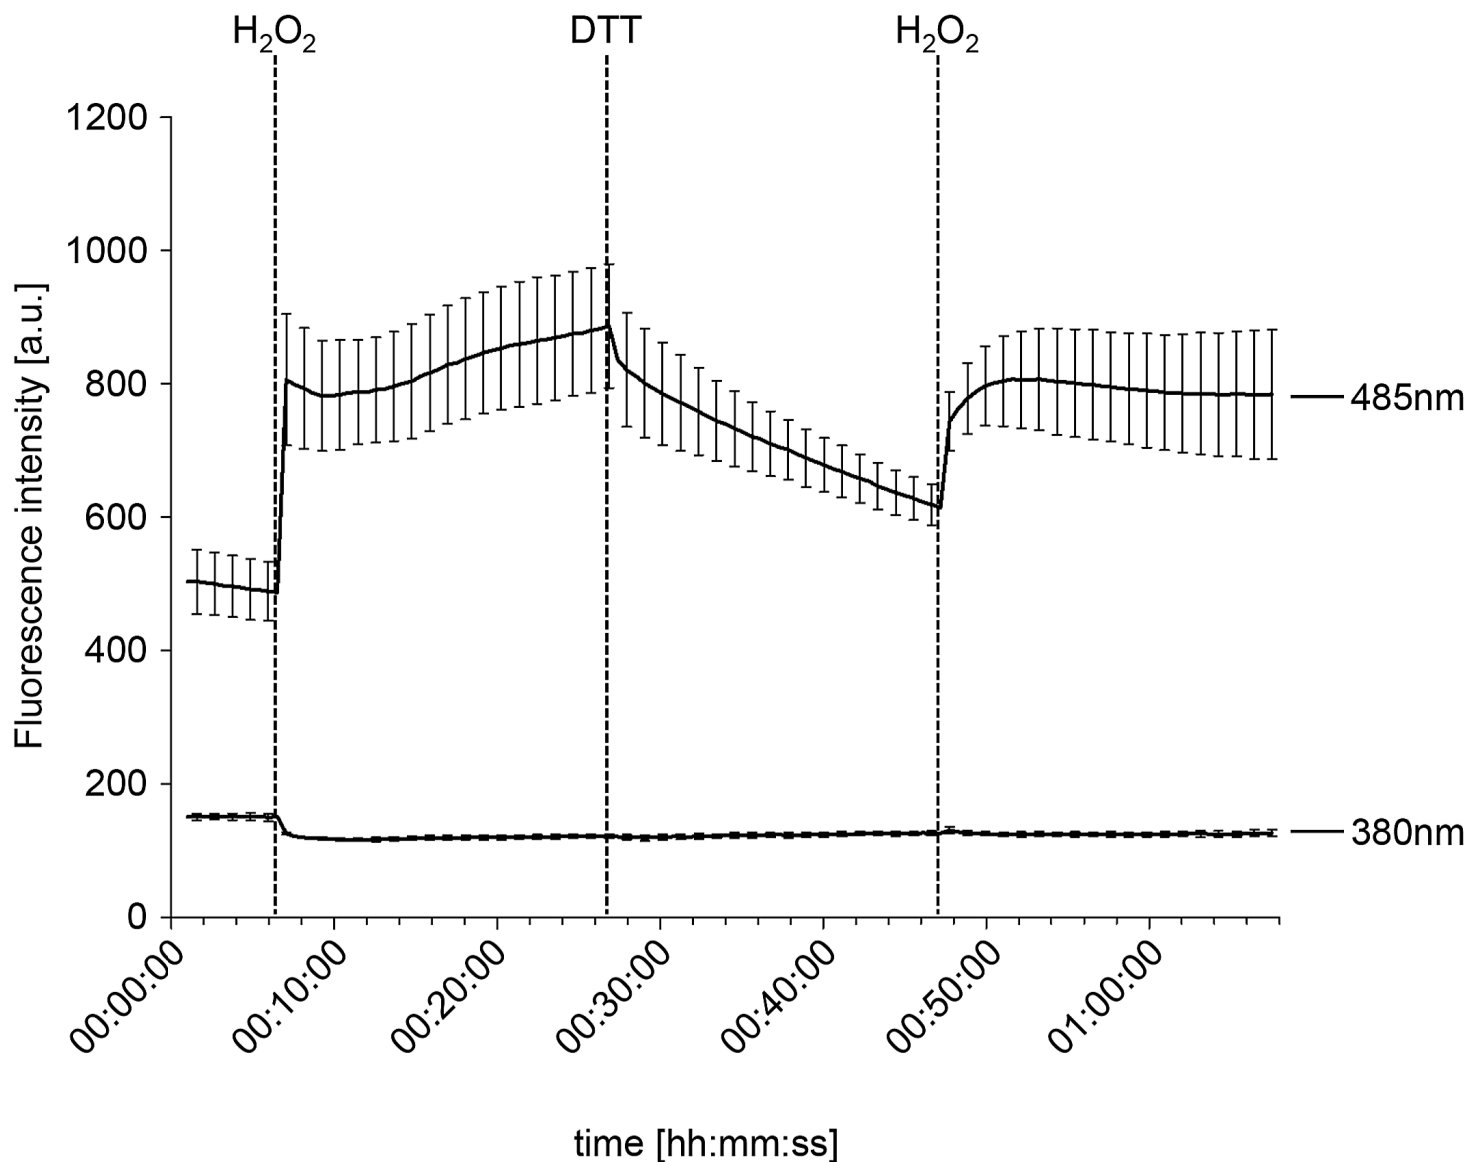

**Figure S4. Fluorescence time course assay of the fungal response to external H<sub>2</sub>O<sub>2</sub> and dithiothreitol (DTT).** Timing of H<sub>2</sub>O<sub>2</sub> (50 mM) and DTT (50 mM) induced changes in HyPer-2-fluorescence intensity after excitation at 380 nm and 485 nm, respectively. Mycelia were raised in a 96-well plate filled with 100  $\mu$ l minimal agar medium and analyzed in a fluorometer. Prior to the first H<sub>2</sub>O<sub>2</sub> injection 100  $\mu$ l H<sub>2</sub>O were injected in each well. Error bars represent the standard deviation (n=24).



# Flow chamber preparation

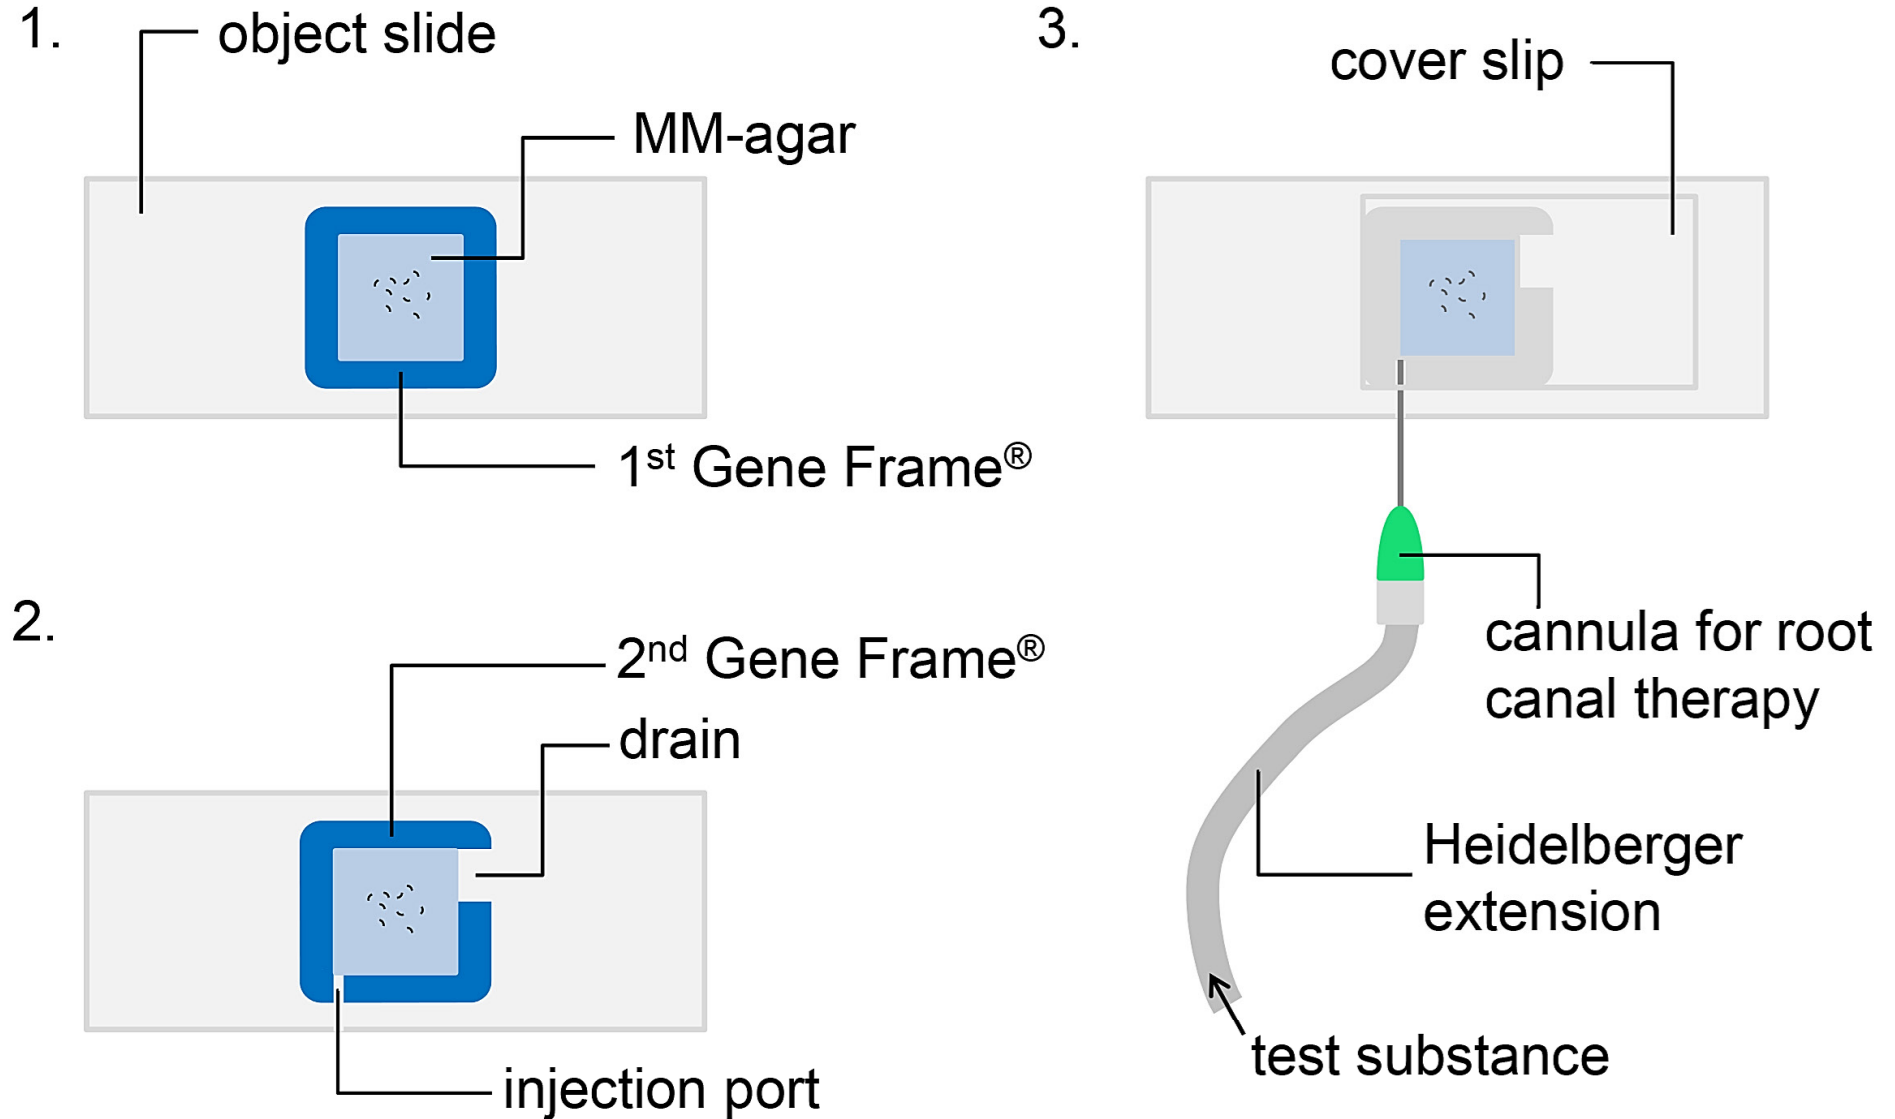

**Figure S5. Flow chamber preparation.** To monitor HyPer-2-responses using confocal laser scanning microscopy a flow chamber was designed that allows simultaneous image acquisition and injection of assay substances, e.g.  $\text{H}_2\text{O}_2$ .

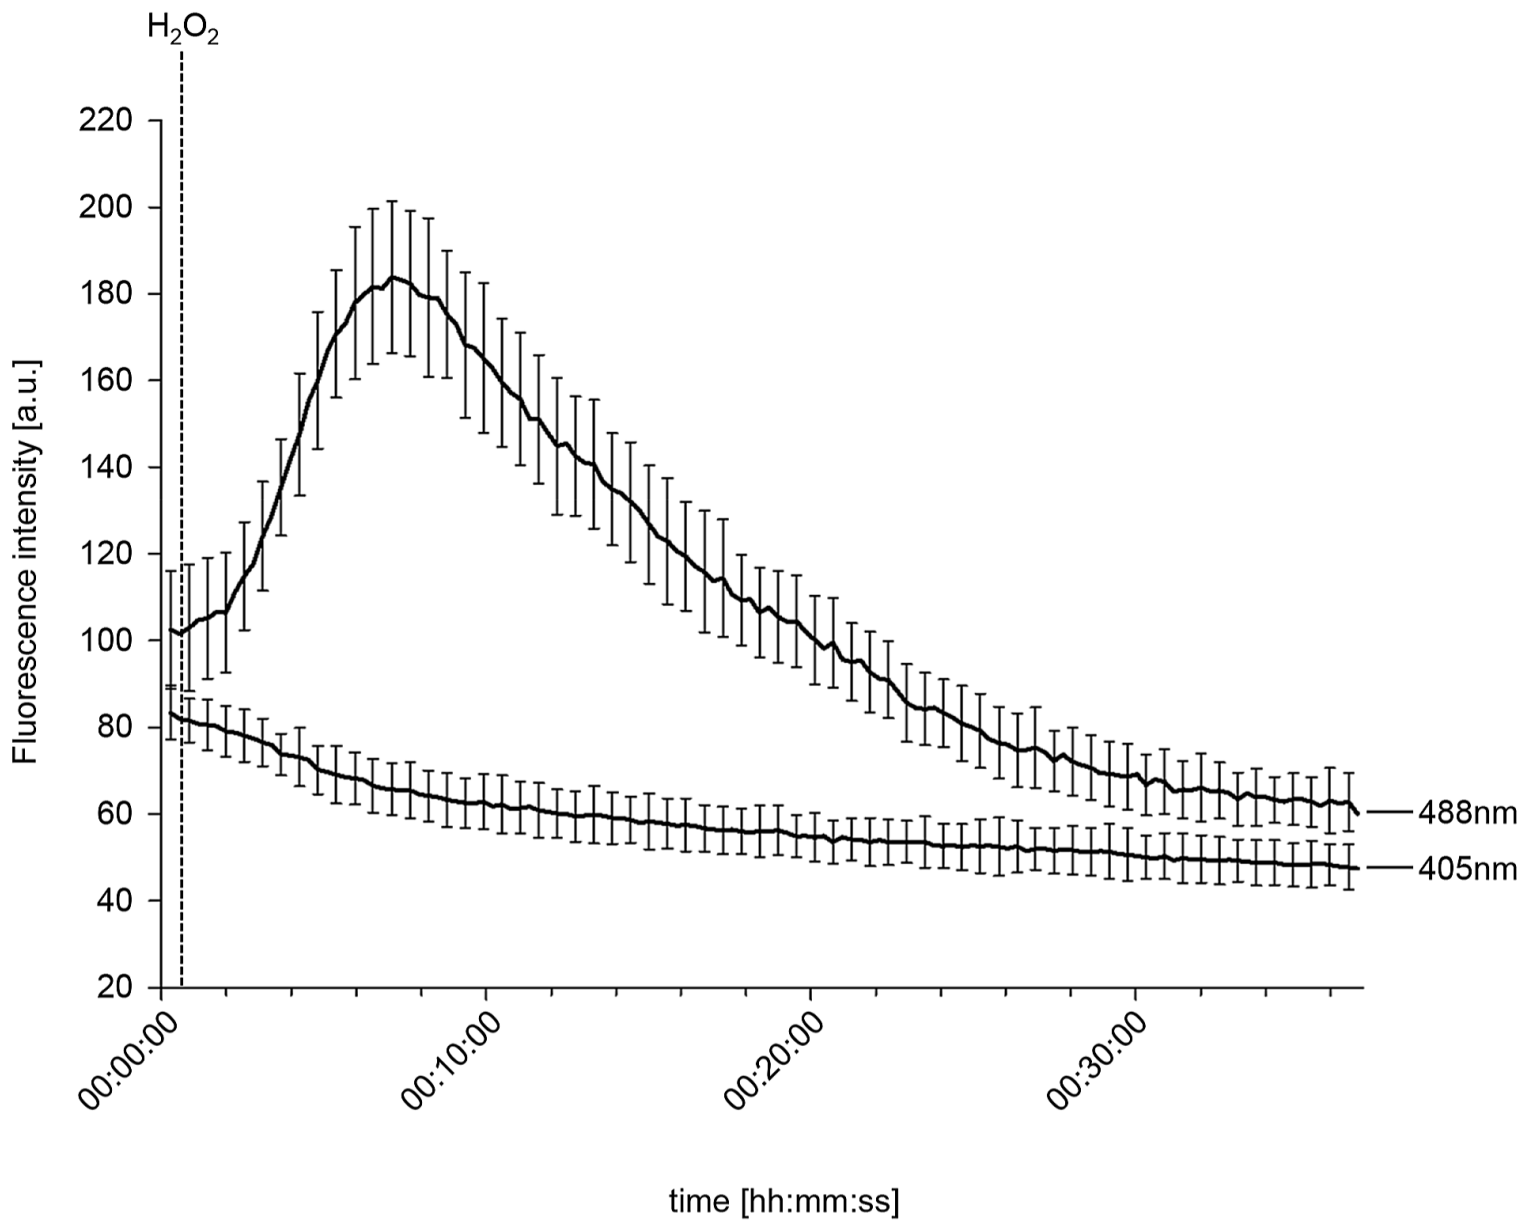

**Figure S6. Fluorescence time course assay of the fungal response to external H<sub>2</sub>O<sub>2</sub>.** Timing of H<sub>2</sub>O<sub>2</sub> (50 mM) induced changes in HyPer-2-fluorescence intensity after excitation at 405 nm and 488 nm, respectively. Mycelia were raised in a flow chamber (see figure S3) and imaged using confocal laser scanning microscopy. Pixel intensities were measured in three regions of interest marked in a confocal laser scanning time series (see video S1). Error bars represent the standard deviation (n=3).

## PH1-HyPer

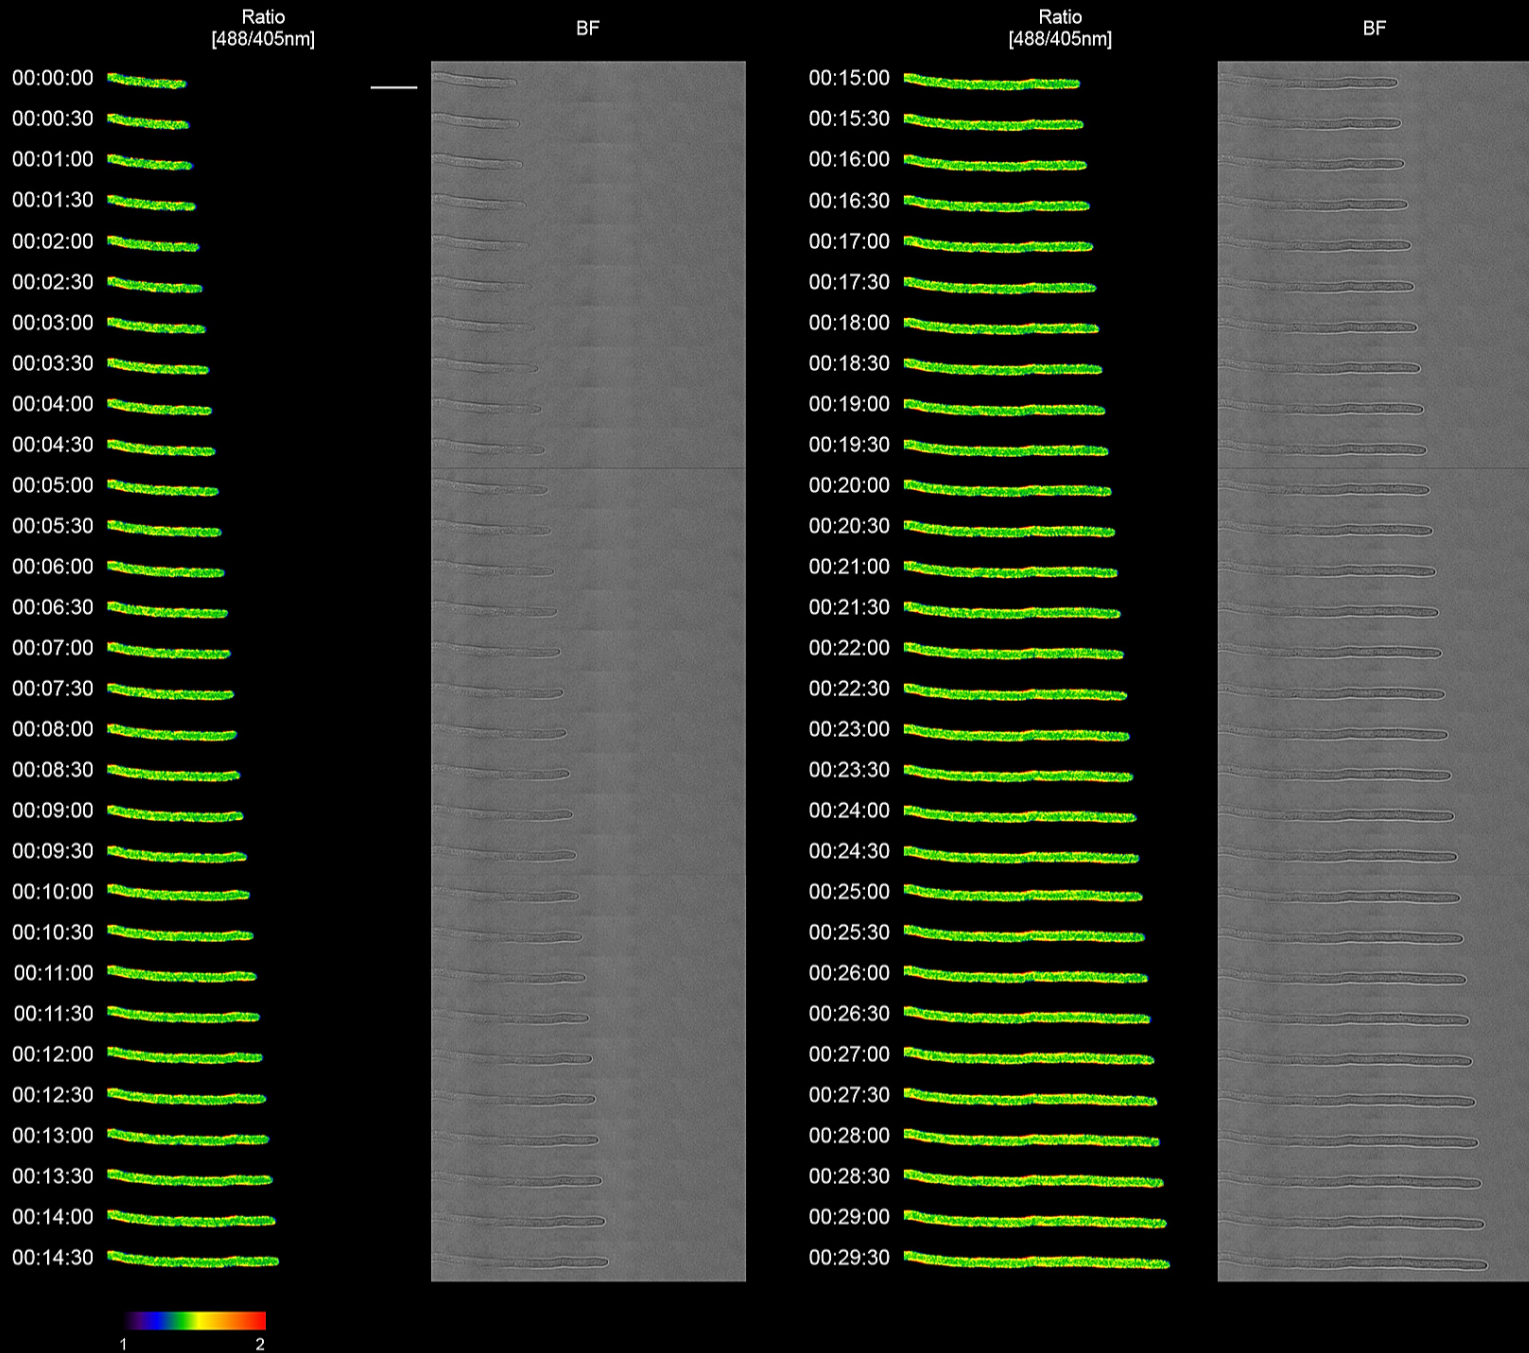

**Figure S7. Ratiometric time course assay of fungal tip growth.** Timing of H<sub>2</sub>O<sub>2</sub> fluctuations (represented by the ratio [488/405 nm]) during tip growth of hypha expressing HyPer-2. See also video S2. Scale bar: 10 μm.



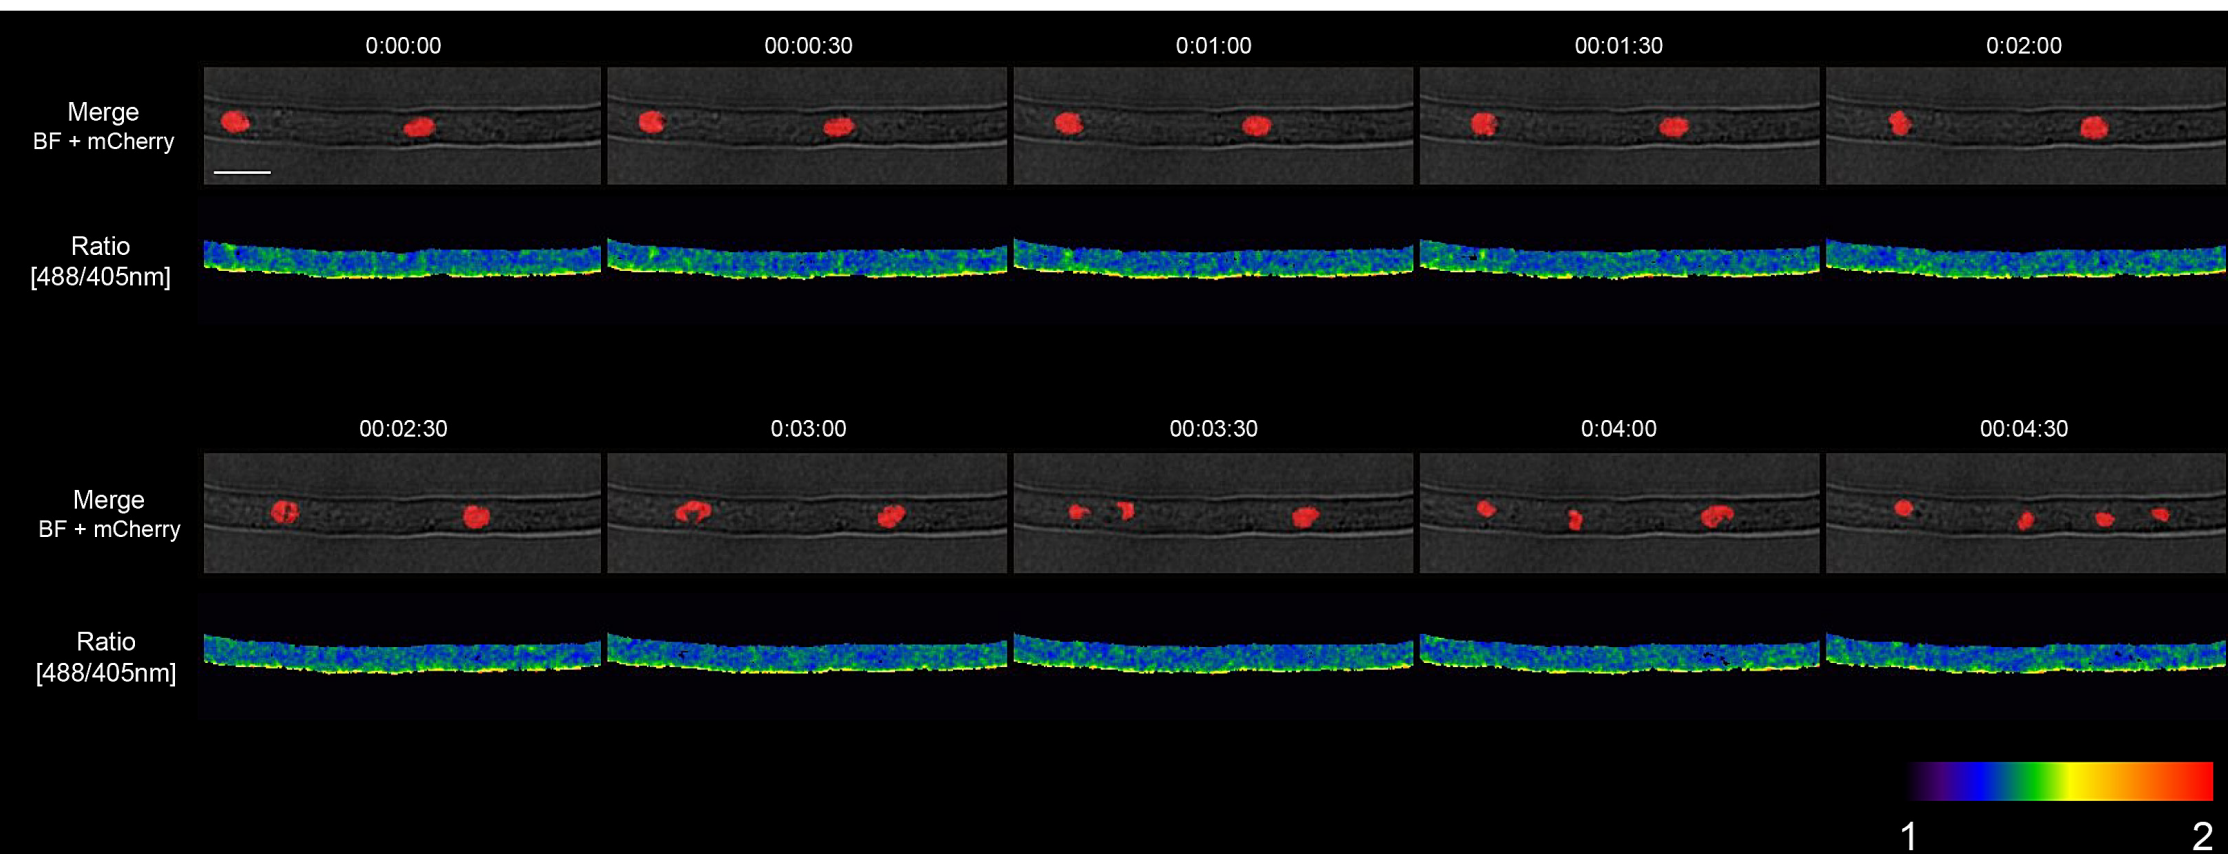

**Figure S8. Ratiometric time course assay of nuclear divisions.** Timing of  $\text{H}_2\text{O}_2$  fluctuations (represented by the ratio [488/405 nm]) during nuclear divisions in hypha expressing HyPer-2. See also video S3. Scale bar: 5  $\mu\text{m}$ .

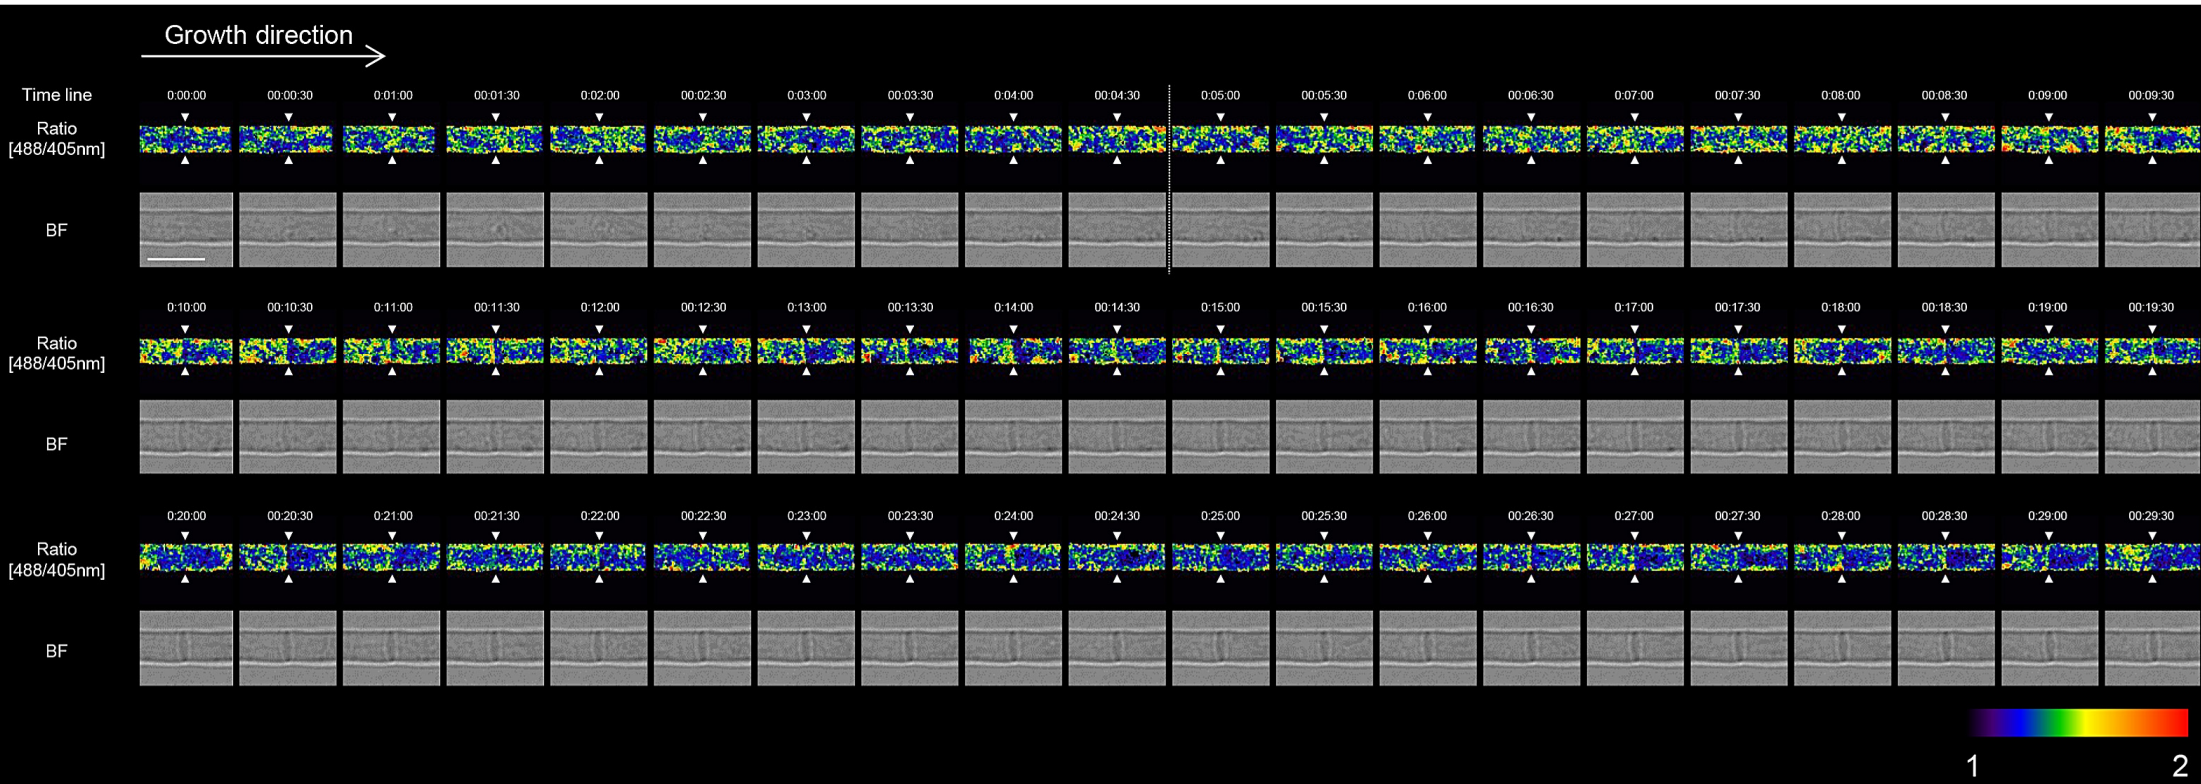

**Figure S9. Ratiometric time course assay of septum formation.** Timing of  $\text{H}_2\text{O}_2$  fluctuations (represented by the ratio [488/405 nm]) during septum formation in hypha expressing HyPer-2. See also video S4. The dotted vertical line represents the initiation of septum formation. Scale bar: 5  $\mu\text{m}$ .

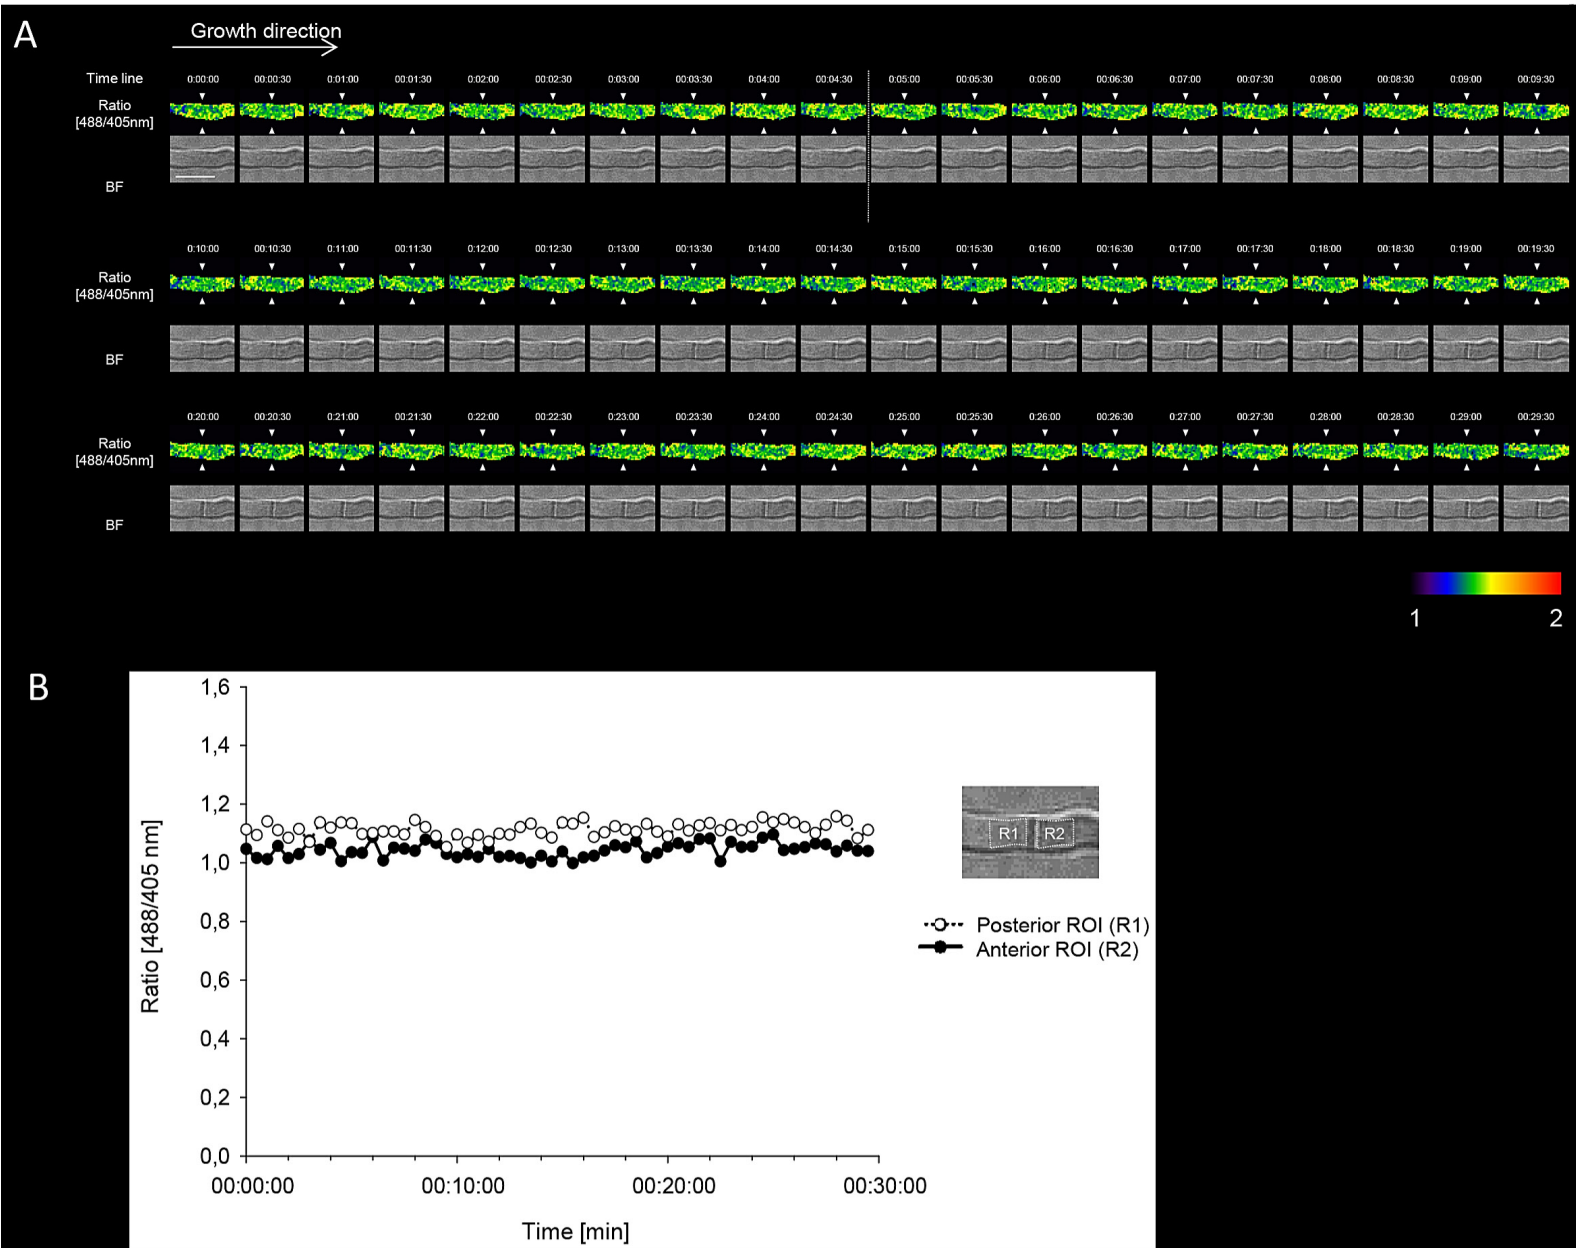

**Figure S10. Ratiometric time course assay of septum formation. A.** Timing of  $\text{H}_2\text{O}_2$  fluctuations (represented by the ratio [488/405 nm]) during septum formation in hypha expressing SypHer. The dotted vertical line represents the initiation of septum formation. Scale bar: 5  $\mu\text{m}$ . **B.** Timing of  $\text{H}_2\text{O}_2$  fluctuations during septum formation. Ratio [488/405 nm] calculated from pixel intensities measurements over time in two regions of interest (ROI R1, covering the posterior part and ROI R2, covering the anterior part of the hypha) marked in a confocal laser scanning time series.



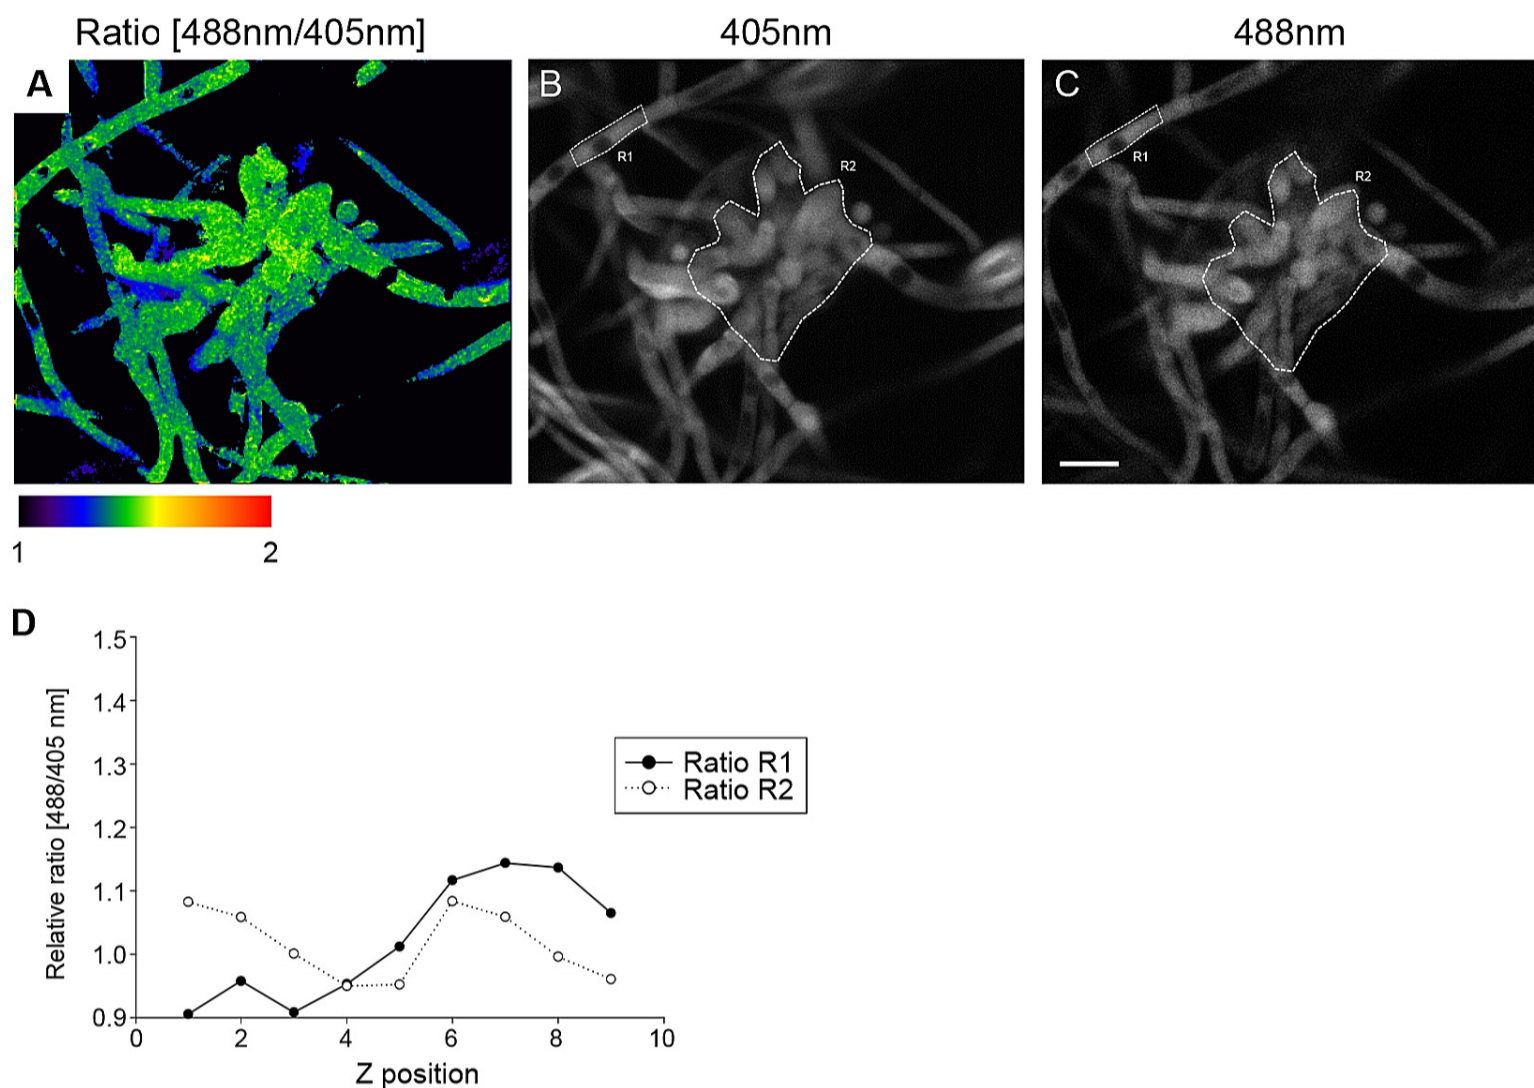

**Figure S11. Ratiometric assay of infection cushion formation in hypha expressing SypHer.** **A-C.** Average intensity projections of a tiny infection cushion developed on a wheat palea 6 days post inoculation. **A.** Ratio [488/405 nm]. **B.** Fluorescence excited at 405 nm. **C.** Fluorescence excited at 488 nm. **D.** Pixel intensities were measured over nine z-positions in two regions of interest (ROI R1, covering a part of a runner hypha and ROI R2, covering a part of an infection cushion) marked in the confocal laser scanning z-series shown in A and B. Analysis of ten different infection structures gave similar results. Scale bar 10  $\mu$ m.

---

**Primer used for amplification of HyPer and SypHer (*Bam*HI enzyme recognition sites introduced to the primers are underlined)**

---

| <b>Sequence (5'→ 3')</b>                                    | <b>Description</b>              | <b>Number</b> |
|-------------------------------------------------------------|---------------------------------|---------------|
| <u>GGATCC</u> GGTACCATGGAGATGGCAAGCCCA<br>GCAGGGCGAGACGATGT | Forward primer<br>HyPer/SypHer  | A1            |
| <u>GGATCC</u> GCTTTTAAACCGCCTGTT                            | Reverse primer HyPer/<br>SypHer | A2            |

---



## Video legends

**Video S1. Fluorescence time course assay of the fungal response to external H<sub>2</sub>O<sub>2</sub>.** Time lapse video of germinating conidiospore. H<sub>2</sub>O<sub>2</sub> (50 mM) supplementation is marked by a red arrow. HyPer-2-fluorescence was recorded after excitation at 405 nm (middle) and 488 nm (left), respectively, and a ratio was calculated (right). Mycelia were raised in a flow chamber (see figure S5) and imaged using confocal laser scanning microscopy.

**Video S2. Fluorescence time course assay of fungal tip growth.** Time lapse video of hyphal growth. HyPer-2-fluorescence was recorded after excitation at 405 nm and 488 nm, respectively, and a ratio was calculated. Mycelia were raised in a flow chamber (see figure S5) and imaged using confocal laser scanning microscopy.

**Video S3. Fluorescence time course assay of nuclear divisions.** Time lapse video of nuclear divisions. HyPer-2-fluorescence was recorded after excitation at 405 nm and 488 nm, respectively, and a ratio was calculated. Mycelia were raised in a flow chamber (see figure S5) and imaged using confocal laser scanning microscopy.

**Video S4. Fluorescence time course assay of septum formation. Time lapse video of septum formation.** HyPer-2-fluorescence was recorded after excitation with 405 nm and 488 nm, respectively, and a ratio was calculated. Mycelia were raised in a flow chamber (see figure S5) and imaged using confocal laser scanning microscopy.
